# Supplementary material for: Enhanced biomass and thermotolerance of Arabidopsis by SiERECTA isolated from Setaria italica L
Source: PeerJ journal article supplement (doi:10.7717/peerj.14452), 2022-12-01

**Annex 5 Figure S2** The conserved structure domain of SiER family members

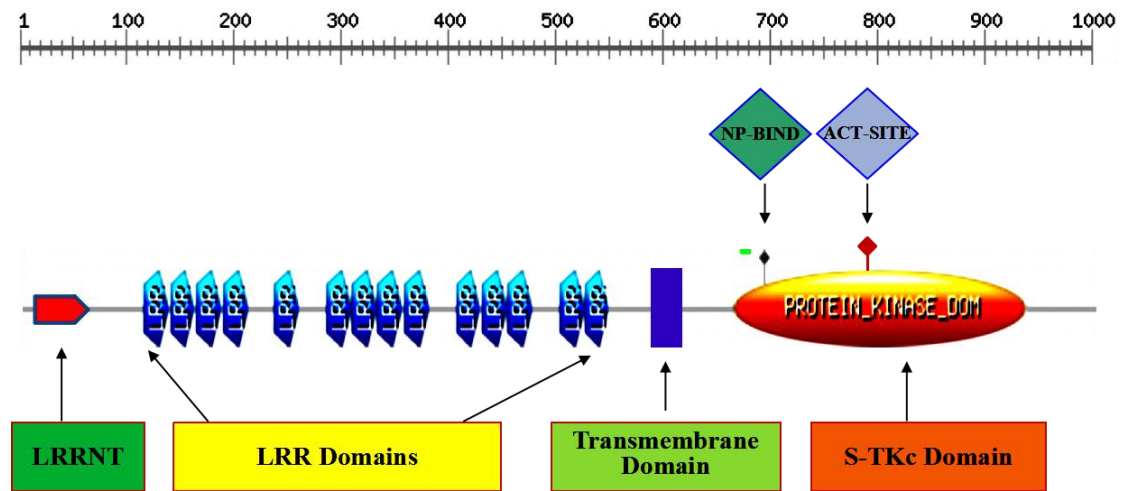

Supplement: 5-Annex_5-Figure_S2__The_conserved_structure_domain_of_SiER_family_members.pdf [file 5-Annex_5-Figure_S2__The_conserved_structure_domain_of_SiER_family_members.pdf]
