# Supplementary material for: Enhanced biomass and thermotolerance of Arabidopsis by SiERECTA isolated from Setaria italica L
Source: PeerJ journal article supplement (doi:10.7717/peerj.14452), 2022-12-01

Annex 6 Figure S3 Alignment of ERECTA family in N-terminal and transmembrane domains

(A) N-terminal signal peptide

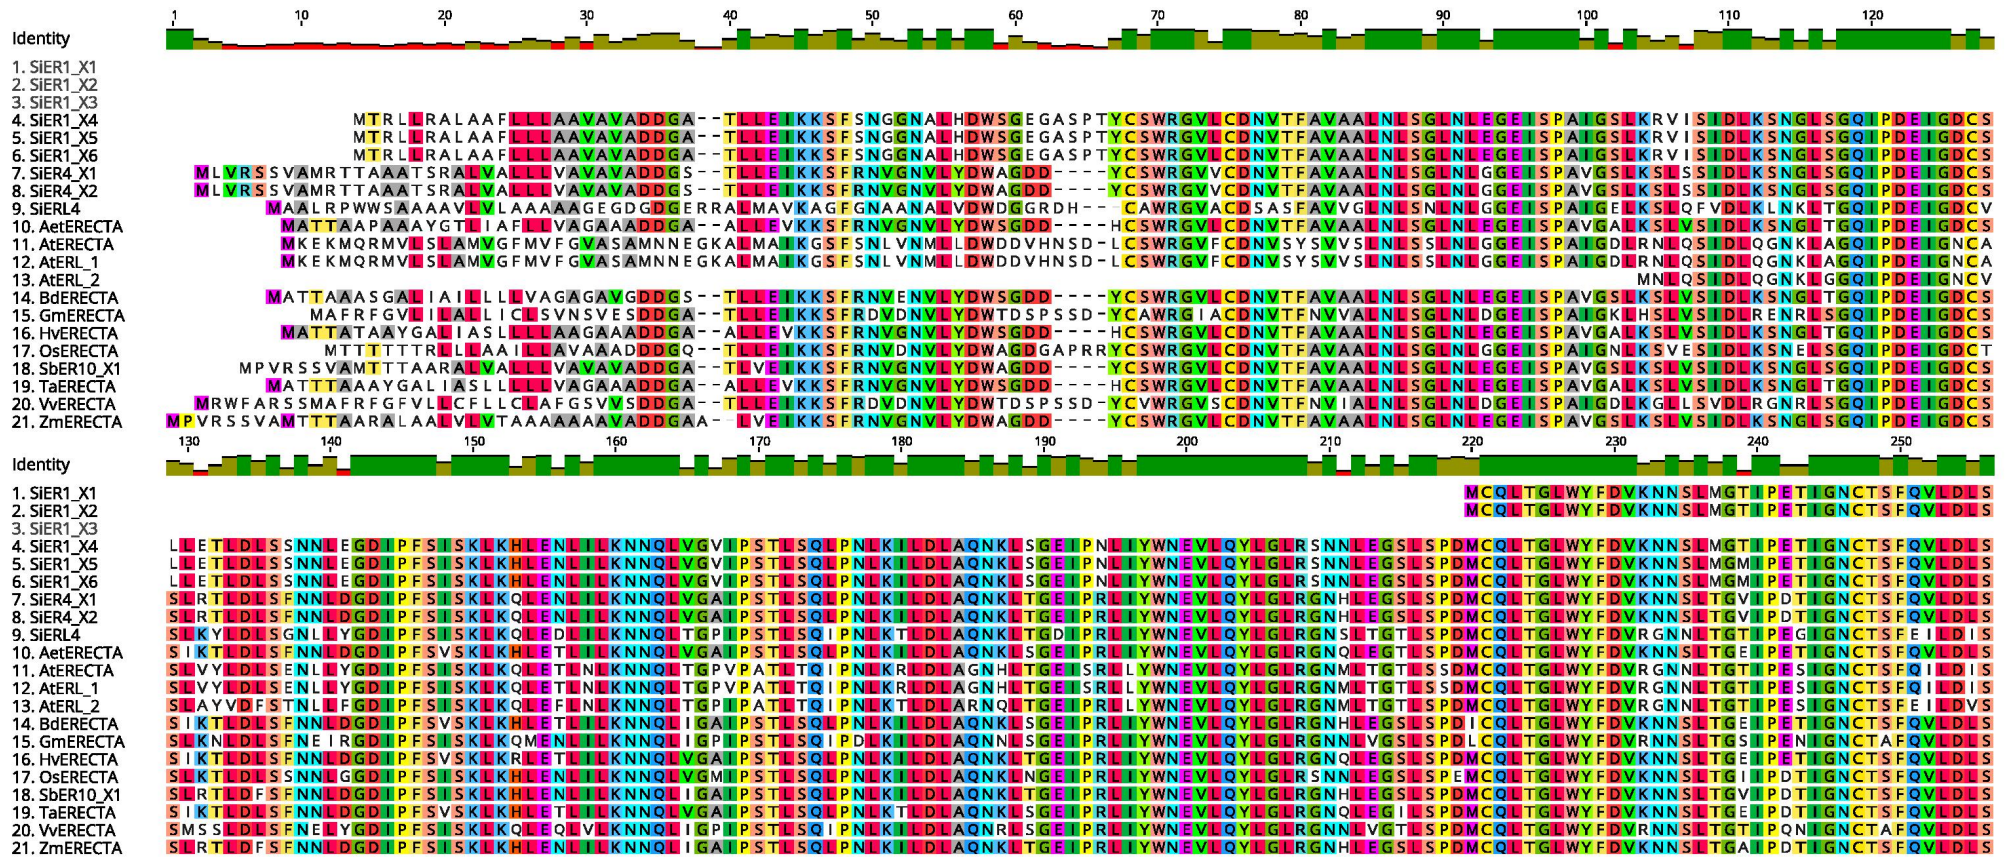

## (B) Transmembrane Domain

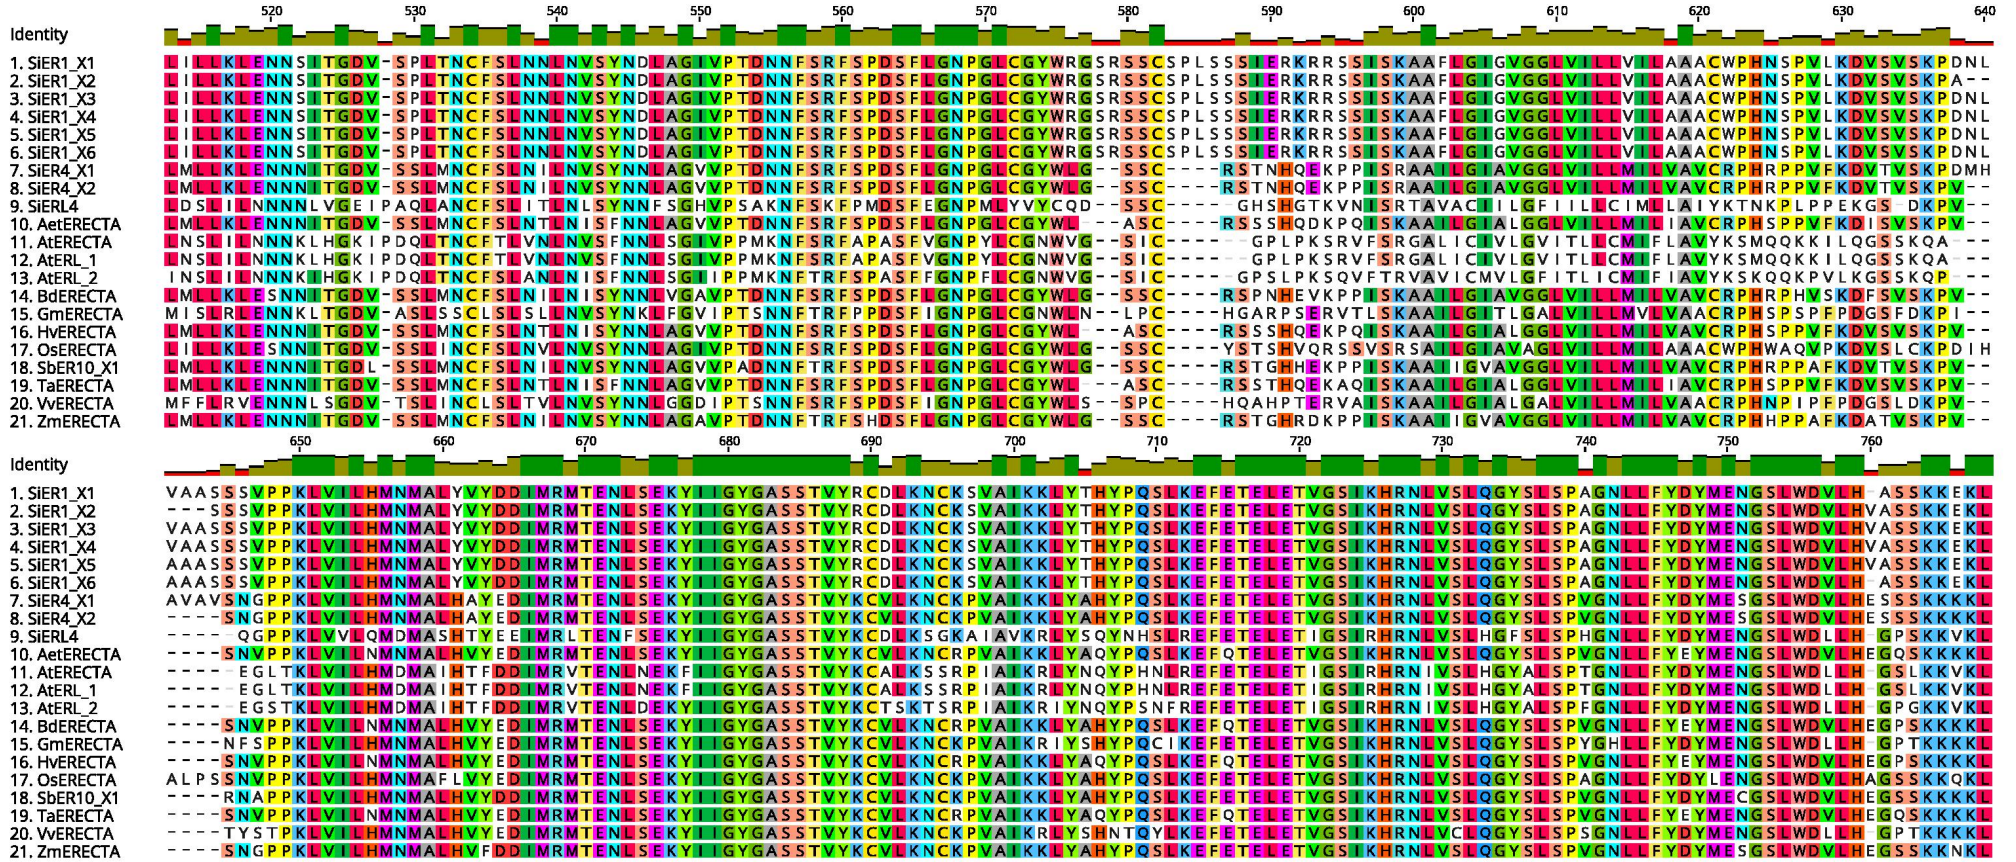

Supplement: 6-Annex_6-Figure_S3___Alignment_of__ERECTA_family_in_N-terminal_and_transmembrane_domains.pdf [file 6-Annex_6-Figure_S3___Alignment_of__ERECTA_family_in_N-terminal_and_transmembrane_domains.pdf]
