# Supplementary material for: Enhanced biomass and thermotolerance of Arabidopsis by SiERECTA isolated from Setaria italica L
Source: PeerJ journal article supplement (doi:10.7717/peerj.14452), 2022-12-01

Annex 7 Figure S4 Isolation of SiER1\_X4 and SiER4\_X1 genes

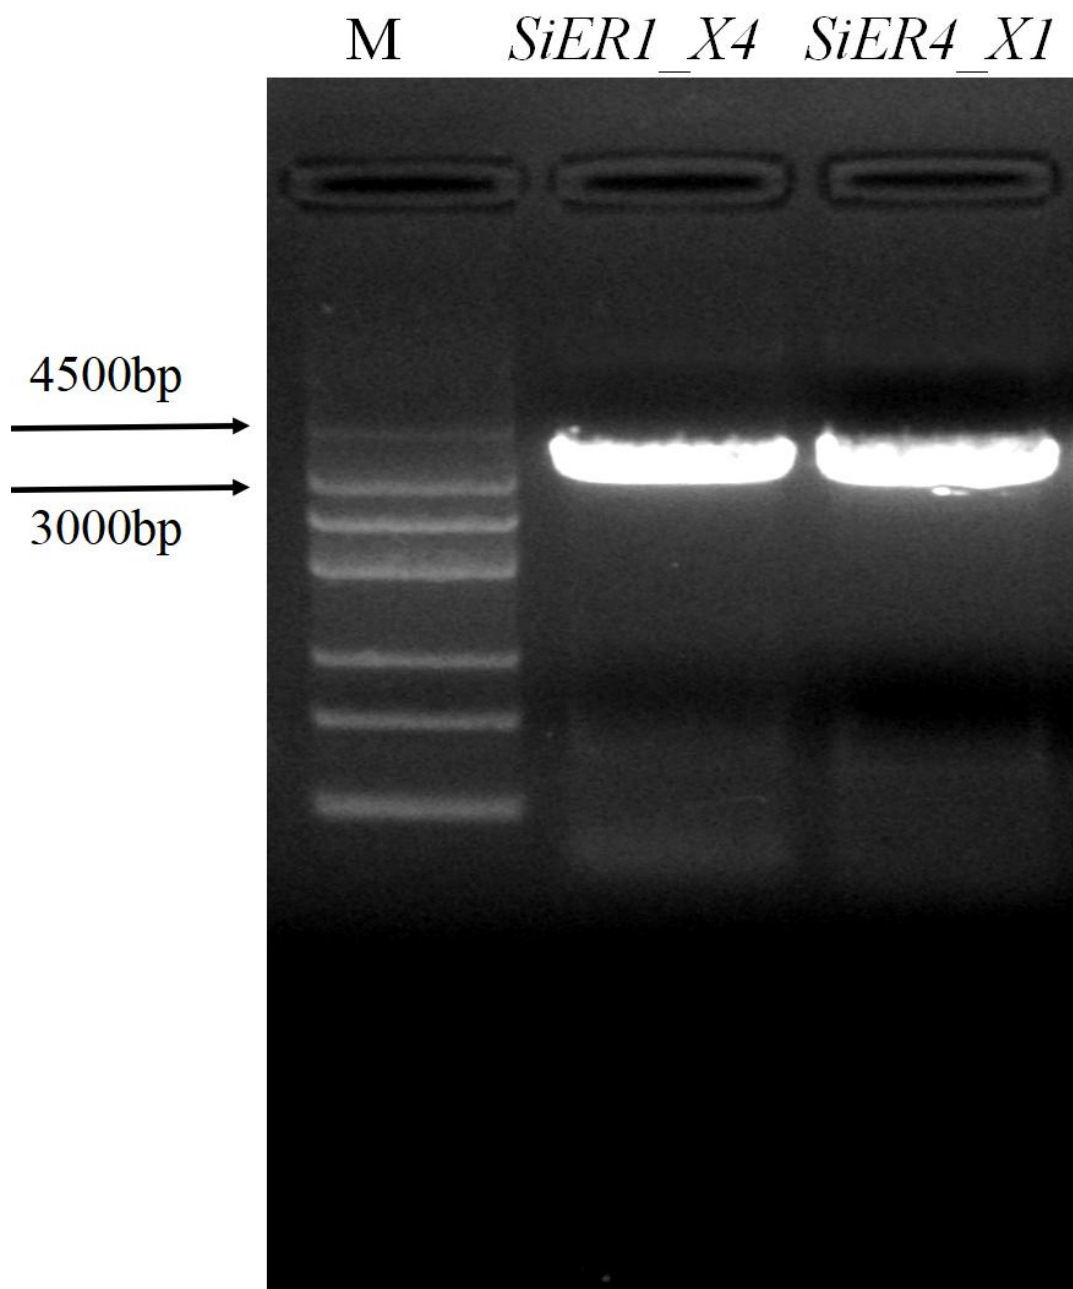

Supplement: 7-Annex_7-Figure_S4___Isolation_of__SiER1_X4_and__SiER4_X1_genes.pdf [file 7-Annex_7-Figure_S4___Isolation_of__SiER1_X4_and__SiER4_X1_genes.pdf]
